# Supplementary material for: Antitumoral Drug: Loaded Hybrid Nanocapsules Based on Chitosan with Potential Effects in Breast Cancer Therapy
Source: MDPI journal article supplement (doi:10.3390/ijms21165659), 2020-08-07
Supplement: s1 [file s1]

## Supplementary material

# Antitumoral Drug - Loaded Hybrid Nanocapsules Based on Chitosan with Potential Effect in Breast Cancer Therapy

Kheira ZANOUNE DELLALI <sup>1,2,3</sup>, Delia Mihaela RATA <sup>4\*</sup>, Marcel POPA <sup>3,4,5\*</sup>, M'hamed DJENNAD <sup>1</sup>, Abdallah OUAGUED <sup>2</sup> and Daniela GHERGHEL <sup>6</sup>

<sup>1</sup>University Abdelhamid Ibn Badis of Mostaganem, Laboratory of Structure, Elaboration and Application of Molecular Materials, Mostaganem, Algeria

<sup>2</sup>University Hassiba Benbouali of Chlef, Faculty of Technology, Chlef BP 151 and Algeria

<sup>3</sup>Gheorghe Asachi Technical University of Iasi, Mangeron Bld. no. 73, 700050 Iasi and Romania

<sup>4</sup>“Apollonia” University of Iasi, Faculty of Medical Dentistry, Pacurari Street, No. 11, Iasi 700511 and Romania

<sup>5</sup>Academy of Romanian Scientists, Splaiul Independentei Street, No 54, 050094 Bucharest and Romania

<sup>6</sup>NIRDBS - Institute of Biological Research Iasi, Department of Experimental and Applied Biology, Lascar Catargi 47, Iasi, 700107, Romania

\* *Corresponding authors:* Marcel POPA: Tel.: +40232278683, fax: +40232271311. Email address: [marpopa2001@yahoo.fr](mailto:marpopa2001@yahoo.fr); Delia Mihaela RATA: Tel.: +40-0232-210.310, fax: +40-0232-210.310. Email address: [iureadeliamihaela@yahoo.com](mailto:iureadeliamihaela@yahoo.com)

## Contents

The magnetic nanocapsules suspension in acetone, in absence (first image) and in presence (second and third images) of magnetic external field (produced by high force magnets).....**Figure S1**

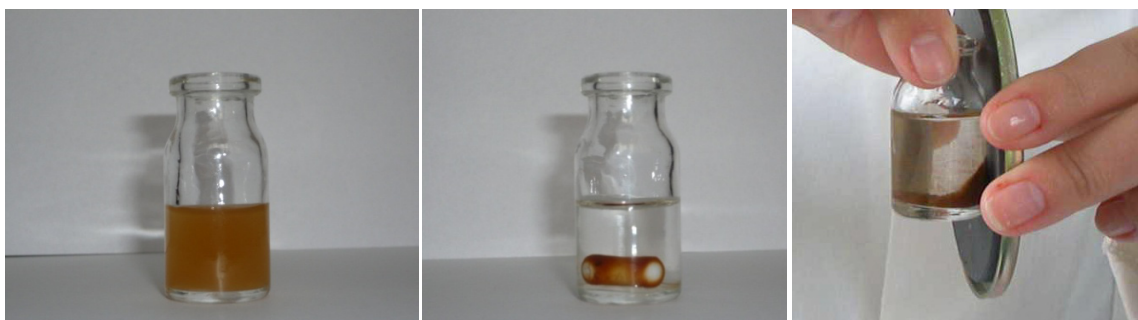

**Figure S1.** The magnetic nanocapsules suspension in acetone, in absence (first image) and in presence (second and third images) of magnetic external field (produced by high force magnets)

**Acknowledgments:** The authors would like to thank to **Prof. Dr. Leonard Ionut Atanase** from “Apollonia” University of Iasi, Faculty of Medical Dentistry, Pacurari Street, No. 11, Iasi 700511, Romania, for his assistance and interest in this study.
